# Supplementary material for: Optical-reconfigurable carbon nanotube and indium-tin-oxide complementary thin-film transistor logic gates
Source: Royal Society of Chemistry journal article supplement (doi:10.1039/c8nr01358f), 2018-01-01
Supplement: c8nr01358f1.pdf [file c8nr01358f1.pdf]

## Supplementary Information

### Optical-Reconfigurable Carbon Nanotube and Indium-Tin-Oxide Complementary Thin-Film Transistor Logic Gates

Jianping Zou,<sup>a</sup> Kang Zhang,<sup>a</sup> Weifan Cai,<sup>a</sup> Tupei Chen,<sup>a</sup> Arokia Nathan<sup>b</sup> and Qing Zhang<sup>\*a</sup>

<sup>a</sup> Novitas, Nanoelectronics Centre of Excellence, School of Electrical & Electronic Engineering, Nanyang Technological University, 50 Nanyang Avenue, 639798, Singapore. E-mail: eqzhang@ntu.edu.sg

<sup>b</sup> Department of Engineering, Electrical Engineering Division, University of Cambridge, 9 JJ Thomson Avenue, Cambridge CB3 0FA, UK.

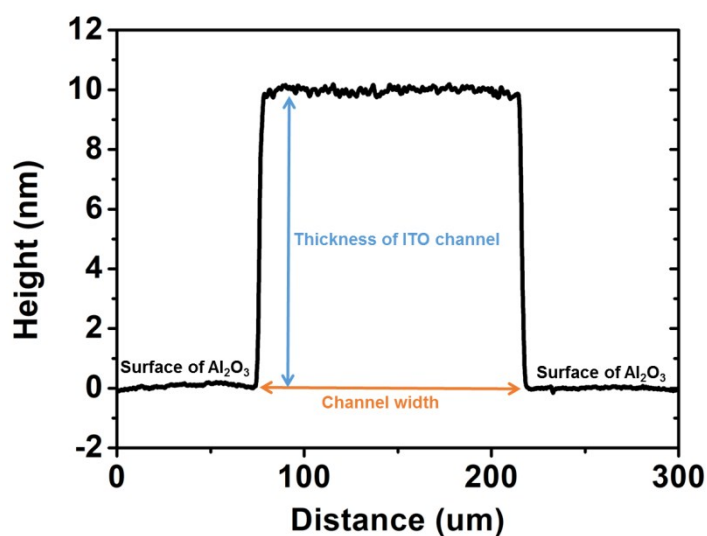

Figure S1. Thickness of the thin ITO channel layer measured using a surface profiler.

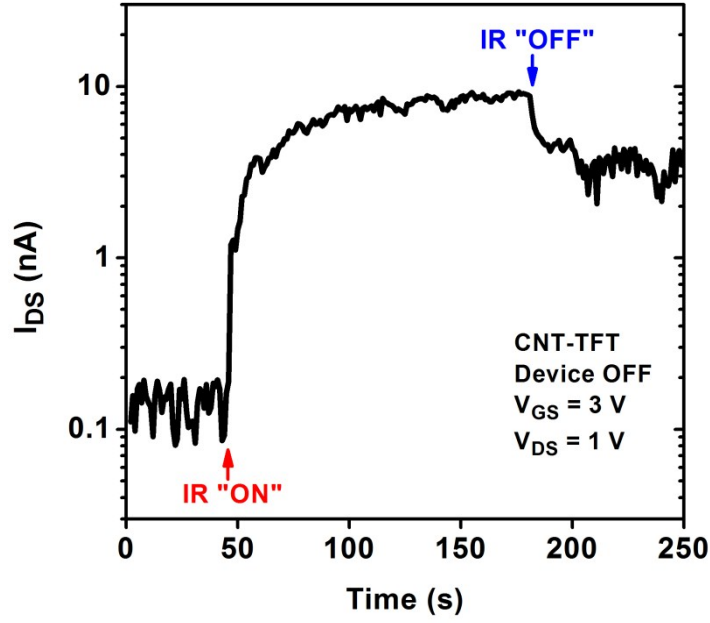

Figure S2. Photoresponse of CNT-TFT under IR (power = 2 Watt,  $\lambda = 1200$  nm) irradiation.

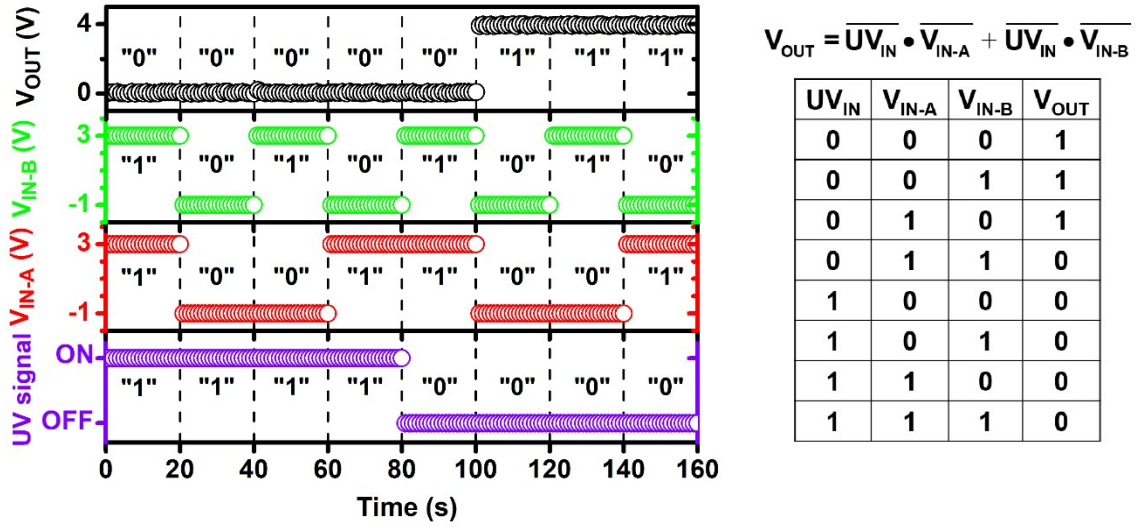

Figure S3. Output electrical signal ( $V_{OUT}$ ) and of the NAND gate ( $V_{DD} = 4$  V) under alternating UV signal ( $UV_{IN}$ ). Inset: true table of logical operation performed by  $UV_{IN}$ ,  $V_{IN-A}$ , and  $V_{IN-B}$ .

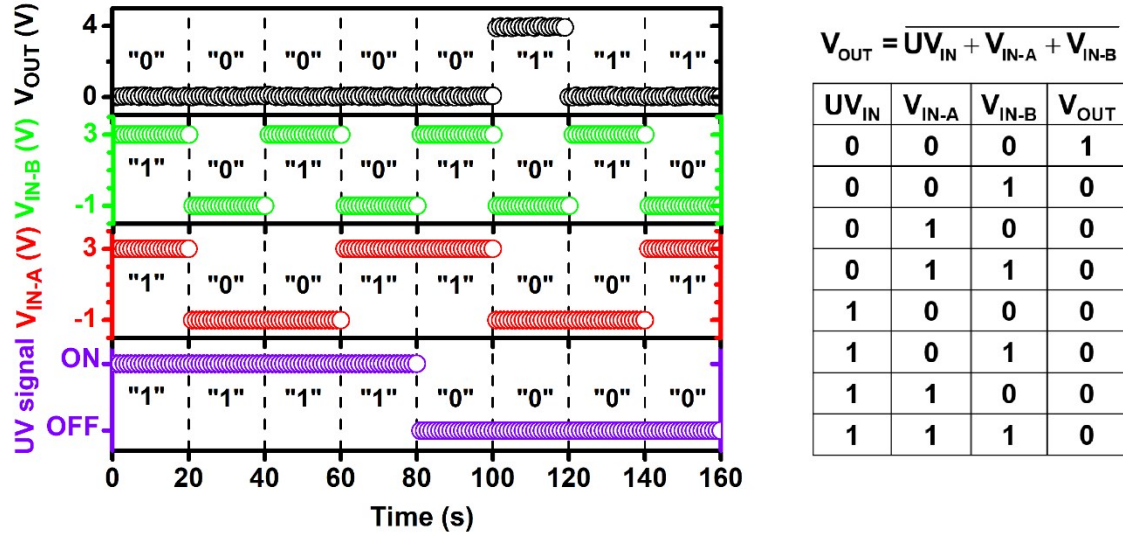

Figure S4. Output electrical signal ( $V_{OUT}$ ) and of the NOR gate ( $V_{DD} = 4$  V) under alternating UV signal ( $UV_{IN}$ ). Inset: true table of logical operation performed by  $UV_{IN}$ ,  $V_{IN-A}$ , and  $V_{IN-B}$ .
